# Supplementary material for: Cyclic nature of the REM sleep-like state in the cuttlefish Sepia officinalis
Source: Oxford University Press journal article supplement (doi:10.1242/jeb.174862), 2018-01-01
Supplement: jeb174862supp.pdf [file jeb174862supp.pdf]

**Table S1.** Duration for all 55 REMS-like iterations and QS intervals in minutes including the date and time of day (to the nearest hour) the sleep-like bout occurred for each cuttlefish. Sleep-like bouts are in separate columns.

| Date                          | Jul-25 | Aug-02 | Jul-29 | Aug-10  |         | Aug-14 | Aug-16 |        | Aug-26 | Aug-28 |
|-------------------------------|--------|--------|--------|---------|---------|--------|--------|--------|--------|--------|
| Time                          | 8am    | 3am    | 10am   | 8am     | 2pm     | 6pm    | 5am    | 11am   | 6am    | 10am   |
| Cuttlefish ID                 | Hippo  | Hippo  | zZ     | MrChips | MrChips | Medusa | Medusa | Medusa | Dumbo  | Clyde  |
| REMS-like iteration (minutes) | 2.37   | 1.55   | 1.30   | 1.43    | 3.18    | 1.93   | 2.37   | 2.68   | 1.67   | 1.45   |
| QS interval (minutes)         | 39.47  | 29.43  | 82.90  | 52.50   | 29.05   | NA     | 48.00  | 30.90  | 32.27  | 56.08  |
| REMS-like                     | 2.72   | 2.18   | 1.30   | 2.15    | 3.08    |        | 2.40   | 2.60   | 2.25   | 2.32   |
| QS                            | 34.83  | 30.30  | 30.12  | 29.27   |         |        | 35.95  | 33.78  | 30.85  | 36.53  |
| REMS-like                     | 3.18   | 2.65   | 2.25   | 2.37    |         |        | 2.30   | 2.70   | 2.58   | 2.50   |
| QS                            | 34.90  | 30.40  | 29.67  | 28.33   |         |        | 30.65  |        | 32.02  | 50.03  |
| REMS-like                     | 2.63   | 2.90   | 1.97   | 2.97    |         |        | 3.17   |        | 2.60   | 1.37   |
| QS                            | 35.87  | 29.38  | 26.43  |         |         |        | 32.62  |        | 31.18  |        |
| REMS-like                     | 2.37   | 2.92   | 1.98   |         |         |        | 2.85   |        | 2.82   |        |
| QS                            | 33.03  | 29.10  | 34.27  |         |         |        | 31.62  |        | 29.37  |        |
| REMS-like                     | 3.13   | 2.67   | 2.78   |         |         |        | 2.62   |        | 2.63   |        |
| QS                            |        | 27.73  | 27.23  |         |         |        | 30.07  |        | 31.53  |        |
| REMS-like                     |        | 2.83   | 2.45   |         |         |        | 3.08   |        | 2.77   |        |
| QS                            |        | 30.18  | 27.53  |         |         |        |        |        | 29.85  |        |
| REMS-like                     |        | 2.93   | 1.60   |         |         |        |        |        | 2.62   |        |
| QS                            |        | 26.00  | 28.43  |         |         |        |        |        | 36.37  |        |
| REMS-like                     |        | 2.38   | 1.62   |         |         |        |        |        | 3.13   |        |
| QS                            |        |        | 24.47  |         |         |        |        |        |        |        |
| REMS-like                     |        |        | 2.30   |         |         |        |        |        |        |        |

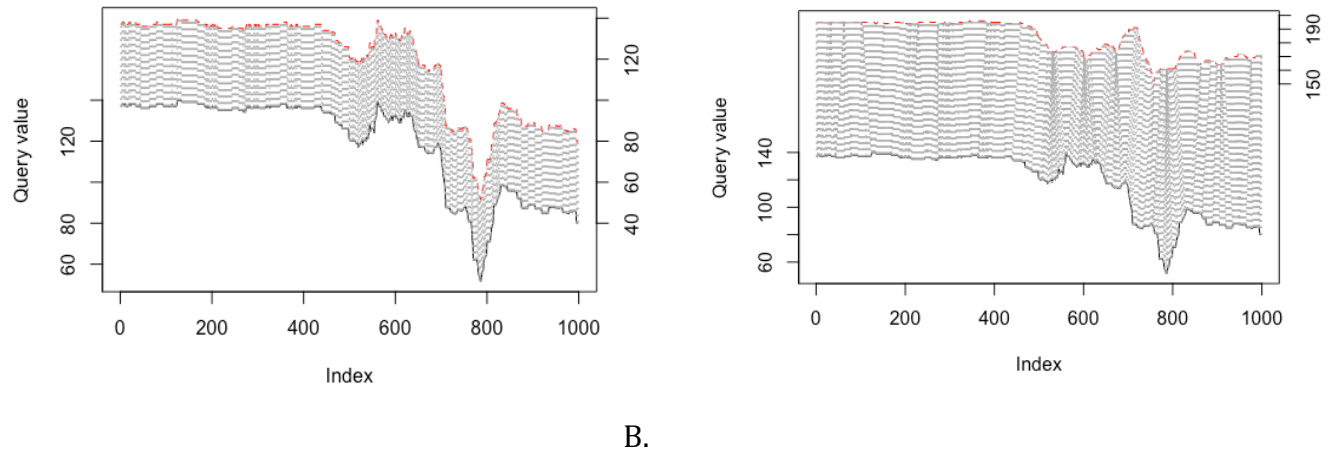

**Figure S1.** Graphic representation of two signals aligned to calculate signal distance using Dynamic Time Warp (*dtw*). The y-axis indicates pixel intensity; however, to visualize the signal matching, spacing is introduced along the y-axis. The x-axis denotes the video frame from a video recording at 30 frames per second. A) Compares a signal to itself. The difference measure returned is 0. B) Aligns two different signals by stretching and compressing to find a best match between the sequences. The difference measure returned is 122887.1.

A.

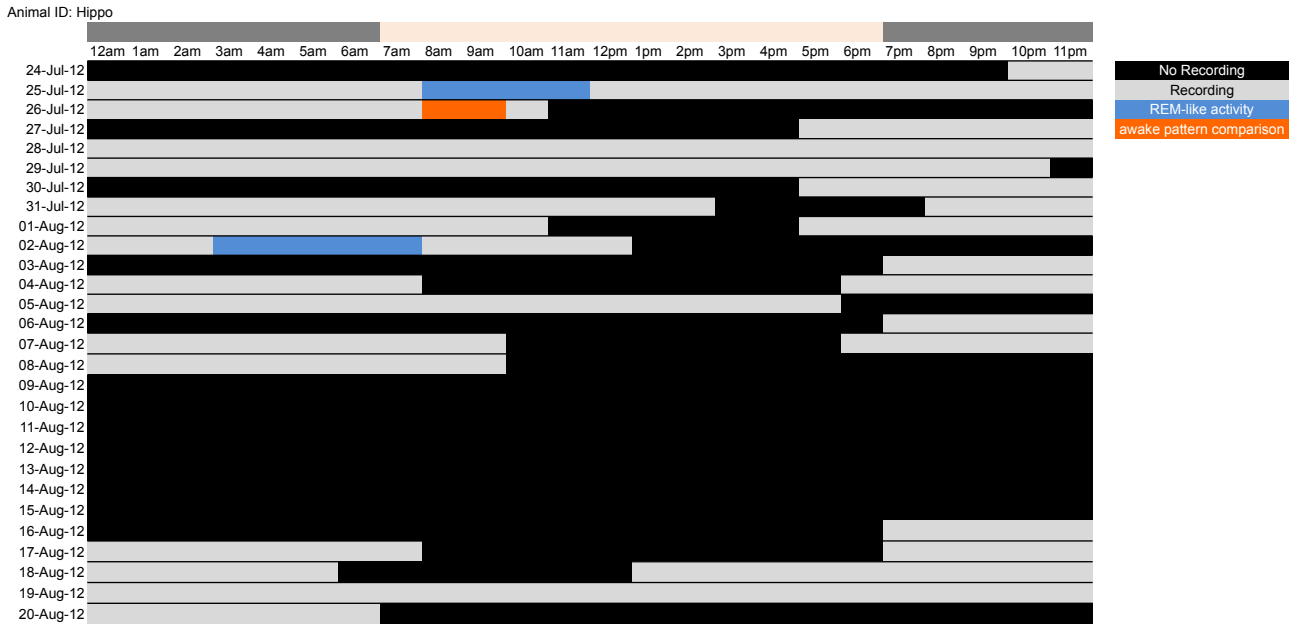

B.

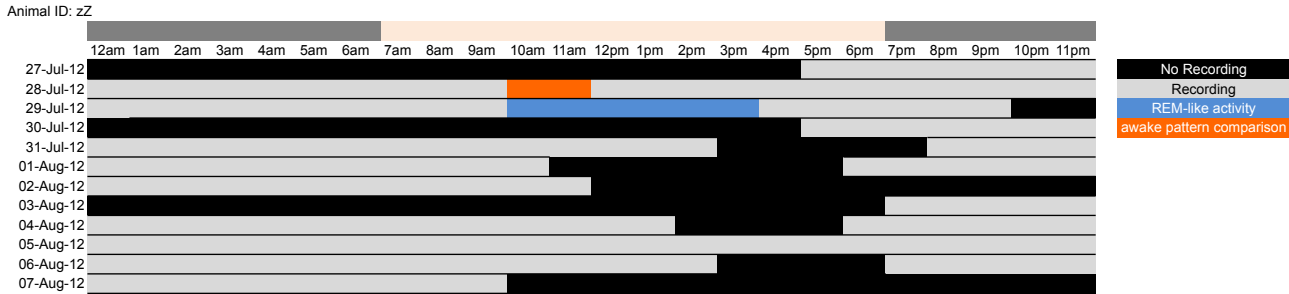

C.

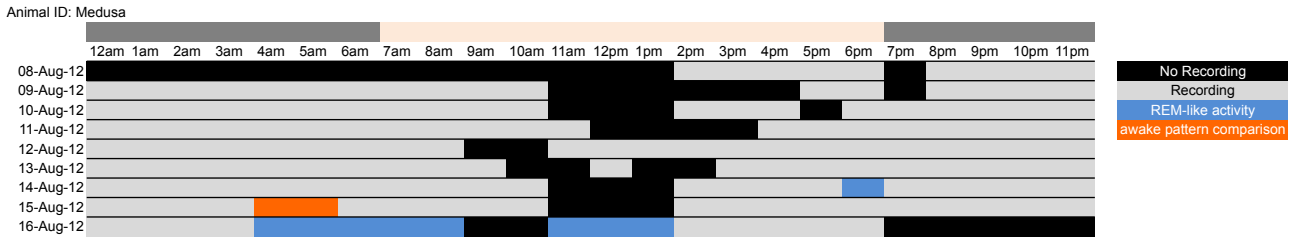

## D.

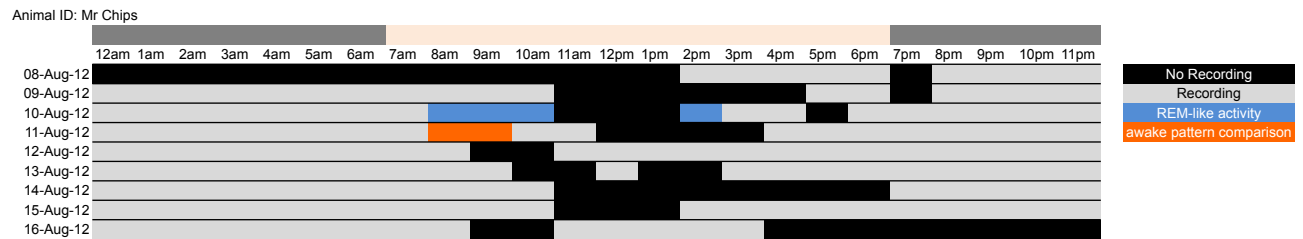

## E.

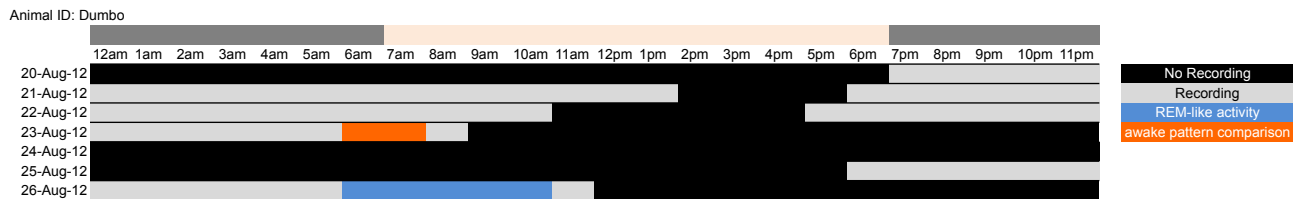

## F.

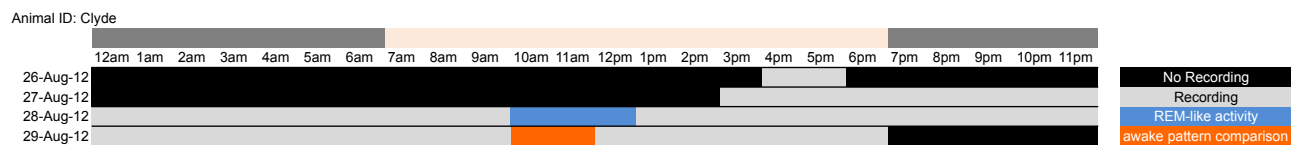

**Figure S2.** Timetable of all animals indicating when they were video recorded (gray) and when a sleep-like bout with REMS-like activity was observed (blue). Black areas indicate intentional breaks in the recording or where video was lost due to technical issues with the hardware. Orange areas indicate where footage of animals in the awake state were used for pattern change counts, however, footage of animals following a sleep-like bout were also used when possible. A) Hippo, B) zZ, C) Medusa (August 14 at 6pm REM-like activity was interrupted by adding food to the tank), D) Mr Chips, E) Dumbo, and F) Clyde.

## Rates of body pattern changes in three different states

| animal ID | state | # changes | # minutes | changes/minute |
|-----------|-------|-----------|-----------|----------------|
| clyde     | awake | 10        | 10.07     | 0.99           |
| clyde     | awake | 10        | 18.08     | 0.55           |
| clyde     | awake | 5         | 12.85     | 0.39           |
| clyde     | qs    | 15        | 15.90     | 0.94           |
| clyde     | qs    | 81        | 20.87     | 3.88           |
| clyde     | rem   | 71        | 1.67      | 42.60          |
| clyde     | rem   | 88        | 2.23      | 39.40          |
| clyde     | rem   | 98        | 2.68      | 36.52          |
| mrchips   | awake | 18        | 21.20     | 0.85           |
| mrchips   | awake | 18        | 20.00     | 0.90           |
| mrchips   | qs    | 10        | 14.10     | 0.71           |
| mrchips   | qs    | 7         | 10.40     | 0.67           |
| mrchips   | qs    | 6         | 17.25     | 0.35           |
| mrchips   | rem   | 86        | 1.80      | 47.78          |
| mrchips   | rem   | 131       | 2.82      | 46.51          |
| mrchips   | rem   | 194       | 2.95      | 65.76          |
| mrchips   | rem   | 207       | 3.33      | 62.10          |
| dumbo     | awake | 16        | 40.63     | 0.39           |
| dumbo     | qs    | 8         | 9.58      | 0.83           |
| dumbo     | qs    | 20        | 24.82     | 0.81           |
| dumbo     | qs    | 11        | 11.57     | 0.95           |
| dumbo     | rem   | 97        | 1.57      | 61.91          |
| dumbo     | rem   | 145       | 3.02      | 48.07          |
| dumbo     | rem   | 187       | 3.05      | 61.31          |
| dumbo     | rem   | 184       | 3.18      | 57.80          |

**Table S2.** Raw count data used in AICc model selection analysis of body pattern changes in each video clip for each state: awake, QS, REMS-like for three animals. Ranges of rates given in the main text originate from this dataset.

**MrCHIPS****REMS-like**

86 changes in first clip

131 in next clip

194 in next clip

207 in last clip

OVERALL: 618

## QS

10 changes in clip QS1 -only one pattern was “full”  
7 changes in clip QS2 -all changes very subtle - no “full” pattern  
6 changes in clip QS3-all changes very subtle - no “full” patterns  
OVERALL: 23

## AWAKE

18 changes in first clip -Note: fin fluttering constantly in between patterns  
18 changes in next clip all camouflage, very subtle, all same pattern (not as jumpy as first clip)  
OVERALL: 36

=====

## DUMBO

**REMS-like**  
97 changes in first clip  
145 in next clip  
187 in next clip  
184 in last clip  
OVERALL: 613

## QS

8 changes in clip QS1 -very subtle tiny changes - amazingly stable overall  
20 changes in clip QS2 -again, very subtle changes -just a faint overall blush hardly noticeable; nearly all pale w just a few small dark spots  
11 changes in clip QS3  
OVERALL: 39

## AWAKE

16 changes in clip  
OVERALL: 16

=====

## CLYDE

**REMS-like**  
71 changes in first clip  
88 in next clip  
98 in next clip  
OVERALL: 257

## QS

15 changes in clip QS1 -only 1 overall pattern change ... all the others are very tiny blushes of components  
81 changes in clip QS2 -many more changes than other QS clips  
OVERALL: 96

## AWAKE

10 minor changes in first clip -changes were very subtle  
10 minor changes in next clip  
5 minor changes in next clip  
OVERALL: 25

NOTES for Table S2. Observational notes regarding body pattern changes in three animals in three different states (awake, quiescent sleep-like (QS), and rapid eye movement sleep-like (REMS-like) states). (notes by RTH, edited by TLI)

---

---

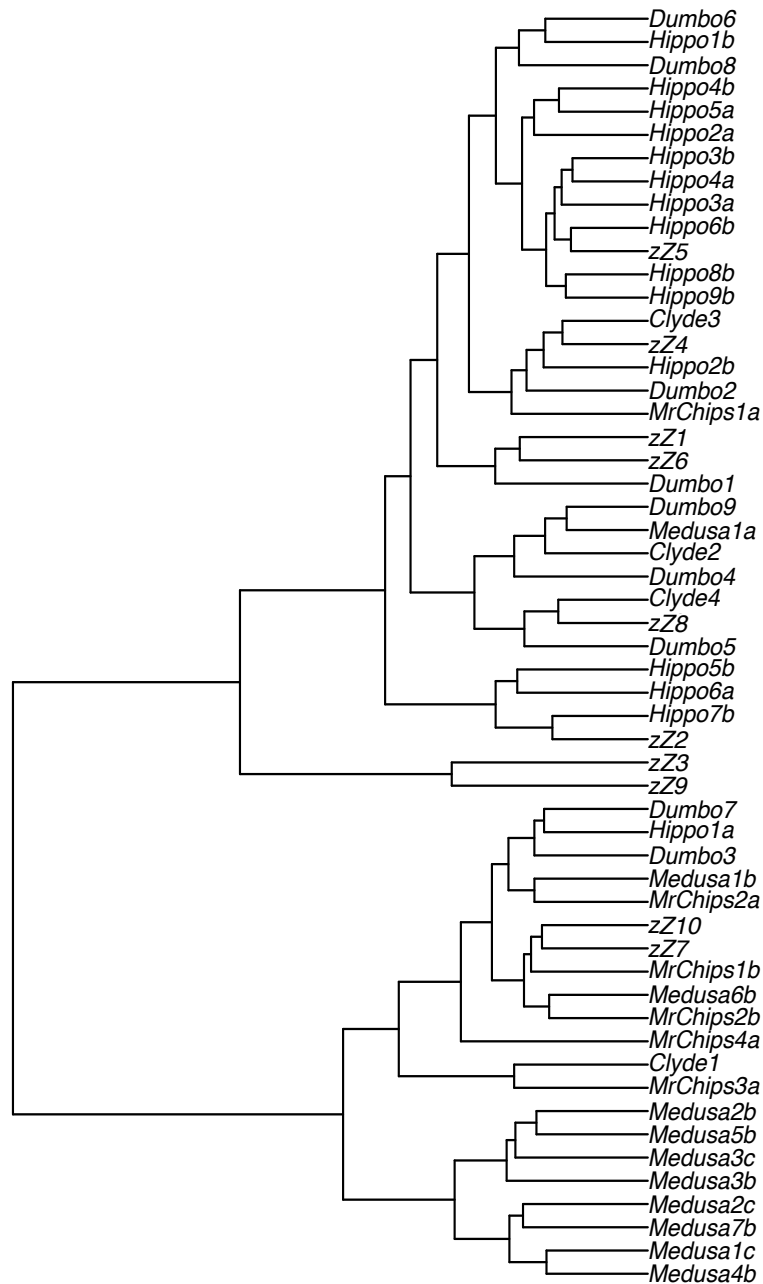

**Figure S3.** Cluster dendrogram, indicating similarity between all REMS-like iterations using data from mantle region. Tip labels indicate the animal (Hippo, zZ, MrChips, Medusa, Dumbo, and Clyde) and REMS-like iteration within a sleep-like bout (1=1<sup>st</sup>, 2=2<sup>nd</sup> ...10= 10<sup>th</sup>). Letters following the number indicate the sleep-like bout (a= 1<sup>st</sup> bout, b=2<sup>nd</sup> bout, c=3<sup>rd</sup> bout).

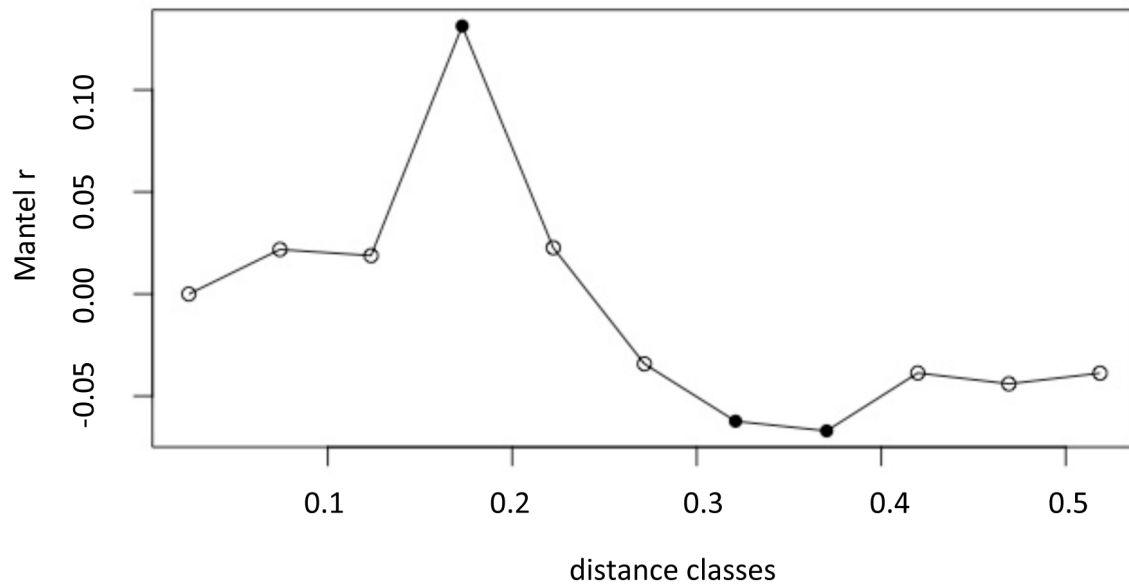

**Figure S4.** Mantel correlogram demonstrating the correlations between an individual animal and the pixel sequence distance matrix for all REMS-like iterations. Dark circles indicate  $p < 0.05$  significance. The points of significance indicate that REMS-like state sequences with higher similarity (larger Mantel  $r$ ) originate from the same animal and sequences more dissimilar to each other originate from different animals. This relationship (Mantel  $r$ ) is not very strong, however.



### Movies of animals in the REMS-like state

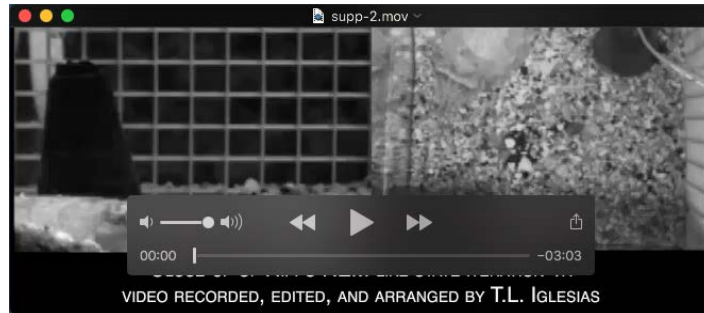

**Movie 1.** Hippo 1a (close up of eye and clear view of skin texture changes)

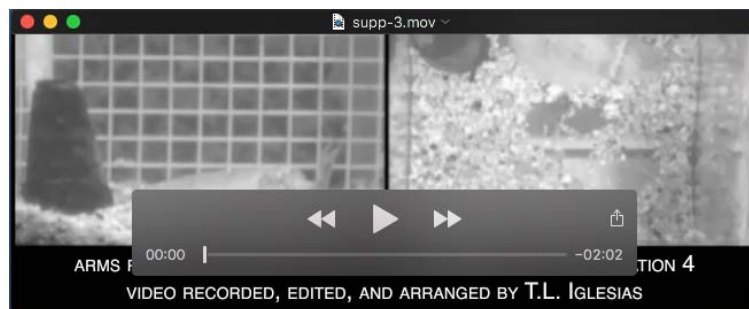

**Movie 2.** Clyde 4 (1<sup>st</sup> pair arms raised during QS state; relax at start of REMS-like state)

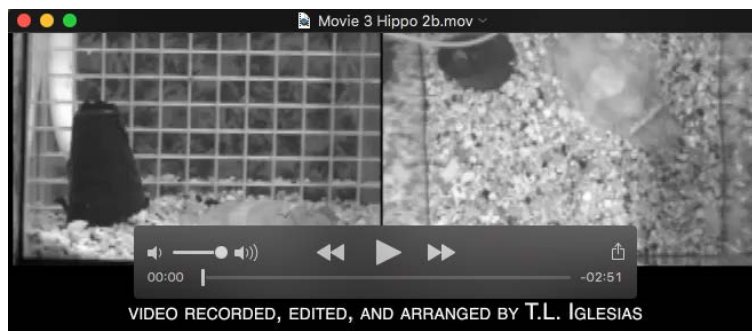

**Movie 3.** Hippo 2b (pupils expand during the REM-like state)

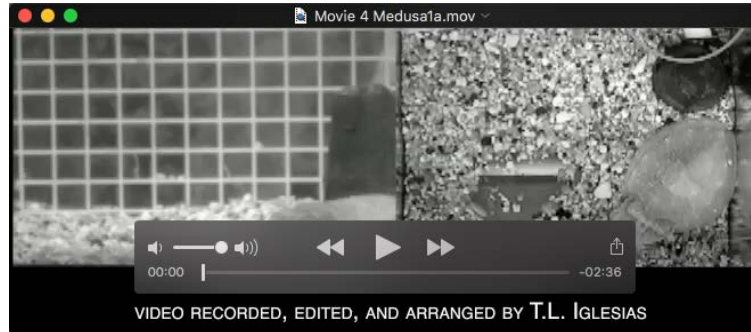

**Movie 4.** Medusa 1a (eye movement and skin texture changes)

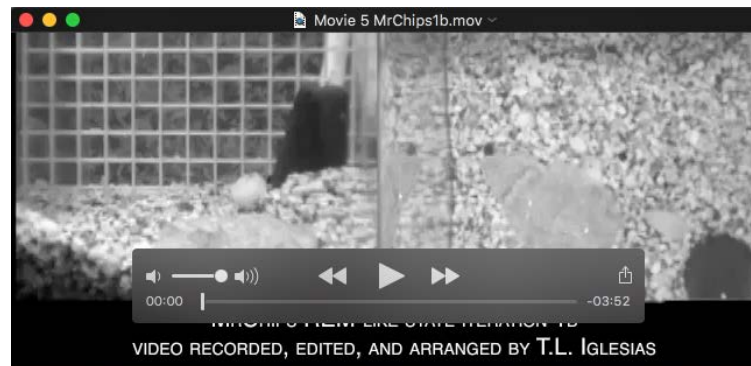

**Movie 5.** MrChips 1b (full arm movement, raising 1st pair)

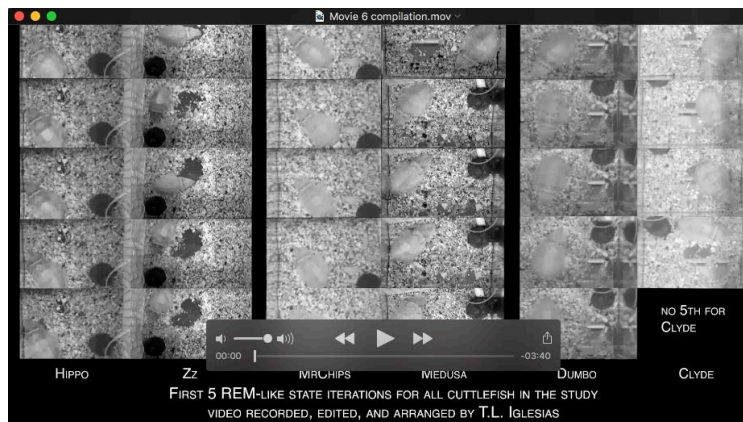

**Movie 6.** (top view of 5 different REMS-like iterations for all individuals in study)
